# Supplementary material for: Nitrogen- and iodine-doped microporous carbon derived from a hydrogen-bonded organic framework: an efficient metal-free electrocatalyst for the oxygen reduction reaction
Source: Royal Society of Chemistry journal article supplement (doi:10.1039/c8ta07994c), 2019-01-01
Supplement: c8ta07994c1.pdf [file c8ta07994c1.pdf]

Electronic Supplementary Information

## Nitrogen- and iodine-doped microporous carbon derived from a hydrogen-bonded organic framework: an efficient metal-free electrocatalyst for oxygen reduction reaction

Wen-Ju Liu,<sup>a †</sup> Ya-Qiong Wen,<sup>b †</sup> Jia-Wei Wang,<sup>a</sup> Di-Chang Zhong,<sup>\*a,b</sup> Jing-Bo Tan<sup>a</sup>  
and Tong-Bu Lu<sup>\*a</sup>

<sup>a</sup> Institute for New Energy Materials & Low Carbon Technologies, School of Material Science & Engineering, Tianjin University of Technology, Tianjin 300384, China

<sup>b</sup> School of Chemistry & Chemical Engineering, Gannan Normal University, Ganzhou 341000, China

E-mail: [zhong\\_dichang@hotmail.com](mailto:zhong_dichang@hotmail.com) (D. C. Zhong);

lutongbu@mail.sysu.edu.cn (T. B. Lu)

**Table S1.** The yield of pyrolyzed carbon synthesized at different temperatures.

| Carbon Materials  | M(HOF-8)/mg | M(Carbon)/mg | Yield/% |
|-------------------|-------------|--------------|---------|
| C <sub>KI</sub>   | 300         | 30           | 10.0    |
| C <sub>700</sub>  | 300         | 125          | 41.7    |
| C <sub>800</sub>  | 300         | 121          | 40.3    |
| C <sub>900</sub>  | 300         | 116          | 38.7    |
| C <sub>1000</sub> | 300         | 100          | 33.3    |

**Table S2.** Content of elements in carbon materials calculated from XPS.

| Carbon materials        | C content/at% | O content/at% | N content/at% | Pyridinic N/at% | I content/at% |
|-------------------------|---------------|---------------|---------------|-----------------|---------------|
| <b>C<sub>KI</sub></b>   | 82.97         | 8.89          | 7.42          | 1.97            | 0.71          |
| <b>C<sub>700</sub></b>  | 84.99         | 10.23         | 4.78          | 1.22            | 0             |
| <b>C<sub>800</sub></b>  | 83.39         | 12.20         | 4.42          | 1.16            | 0             |
| <b>C<sub>900</sub></b>  | 80.95         | 15.27         | 3.78          | 1.09            | 0             |
| <b>C<sub>1000</sub></b> | 85.42         | 12.17         | 2.41          | 0.29            | 0             |

**Table S3.** BET surface areas and pore volumes of carbon materials.

| Carbon materials        | BET Surface Areas/m <sup>2</sup> g <sup>-1</sup> | Total Pore Volumes/cm <sup>3</sup> g <sup>-1</sup> |
|-------------------------|--------------------------------------------------|----------------------------------------------------|
| <b>C<sub>KI</sub></b>   | 1140                                             | 0.562                                              |
| <b>C<sub>700</sub></b>  | 22                                               | 0.026                                              |
| <b>C<sub>800</sub></b>  | 327                                              | 0.147                                              |
| <b>C<sub>900</sub></b>  | 282                                              | 0.138                                              |
| <b>C<sub>1000</sub></b> | 142                                              | 0.078                                              |

**Table S4.** I<sub>D</sub>/I<sub>G</sub> values calculated from Raman spectra.

| Carbon materials        | I <sub>D</sub> /I <sub>G</sub> |
|-------------------------|--------------------------------|
| <b>C<sub>KI</sub></b>   | 1.10                           |
| <b>C<sub>700</sub></b>  | 1.10                           |
| <b>C<sub>800</sub></b>  | 1.08                           |
| <b>C<sub>900</sub></b>  | 1.06                           |
| <b>C<sub>1000</sub></b> | 1.05                           |

**Table S5.** Various parameters of carbon materials for ORR catalysis obtained from RDE experiments.

| Carbon materials        | Onset potential/V vs. RHE | Halfwave potential/V vs. RHE | Limited current density (@0.213 V vs. RHE)/mA cm <sup>-2</sup> | Kinetic current density (@0.830 V vs. RHE) /mA cm <sup>-2</sup> |
|-------------------------|---------------------------|------------------------------|----------------------------------------------------------------|-----------------------------------------------------------------|
| <b>C<sub>KI</sub></b>   | 0.944                     | 0.828                        | 4.96                                                           | 4.470                                                           |
| <b>C<sub>700</sub></b>  | 0.744                     | 0.539                        | 2.02                                                           | 0.004                                                           |
| <b>C<sub>800</sub></b>  | 0.862                     | 0.705                        | 3.64                                                           | 0.112                                                           |
| <b>C<sub>900</sub></b>  | 0.850                     | 0.704                        | 2.76                                                           | 0.077                                                           |
| <b>C<sub>1000</sub></b> | 0.836                     | 0.703                        | 2.57                                                           | 0.050                                                           |
| Pt/C                    | 0.936                     | 0.816                        | 5.45                                                           | 2.742                                                           |

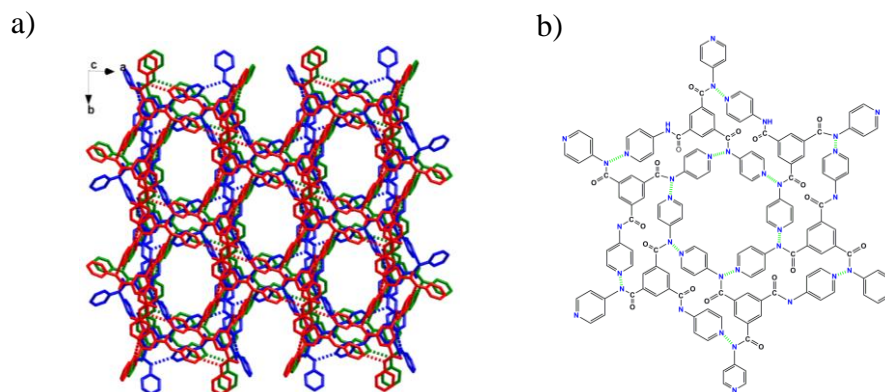

**Fig. S1** a) The 3D supramolecular structure of HOF-8, and b) the chemical structure of HOF-8.

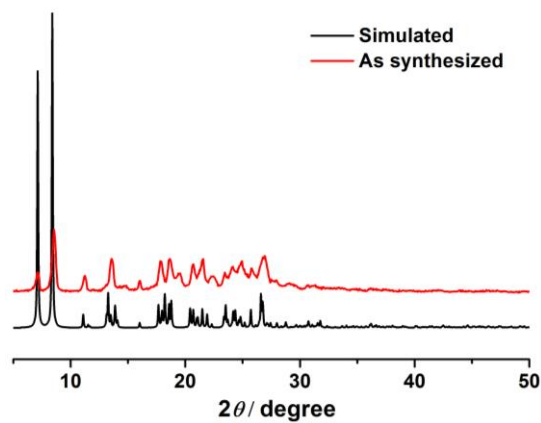

**Fig. S2** Powder XRD of HOF-8 at room temperature.

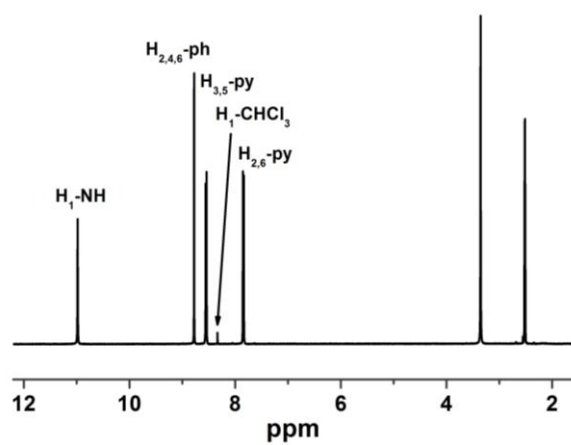

**Fig. S3**  $^1\text{H}$  NMR spectrum of HOF-8 (DMSO- $d_6$ , 400 MHz, 298 K).

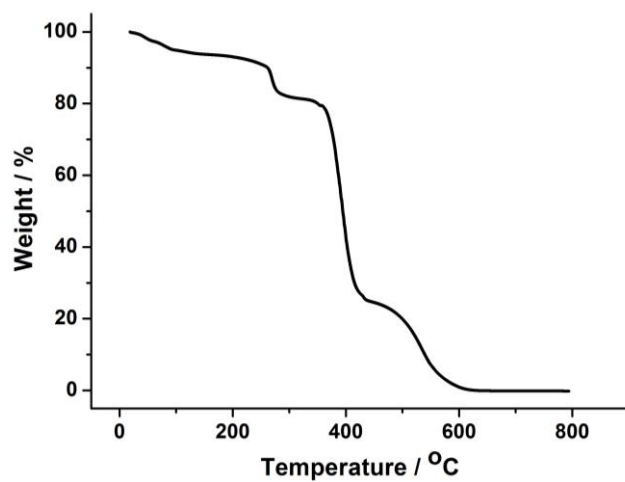

**Fig. S4** TGA curve of HOF-8 at the N<sub>2</sub> atmosphere.

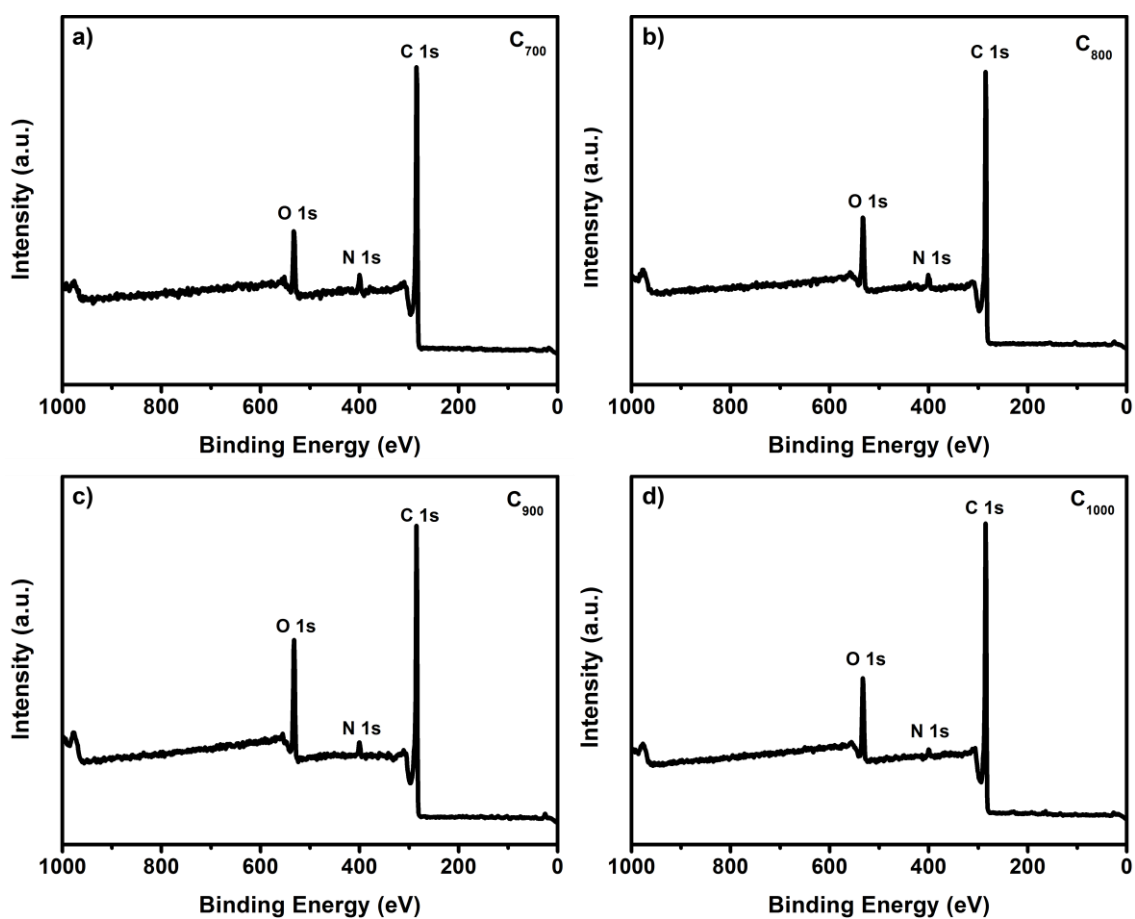

**Fig. S5** XPS spectra of a) C<sub>700</sub>, b) C<sub>800</sub>, c) C<sub>900</sub> and d) C<sub>1000</sub>.

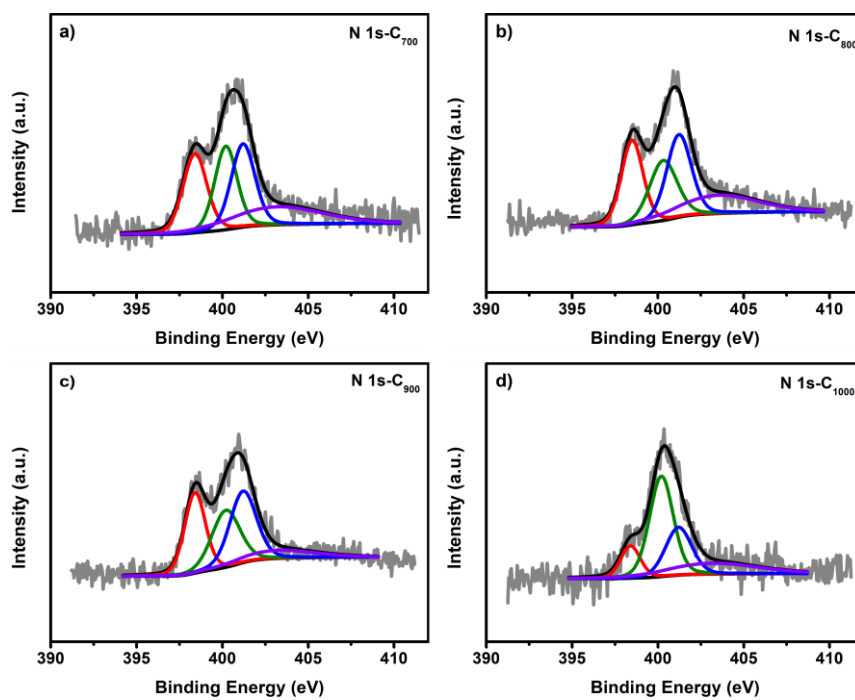

**Fig. S6** High resolution N 1s spectra of a) C<sub>700</sub>, b) C<sub>800</sub>, c) C<sub>900</sub> and d) C<sub>1000</sub>.

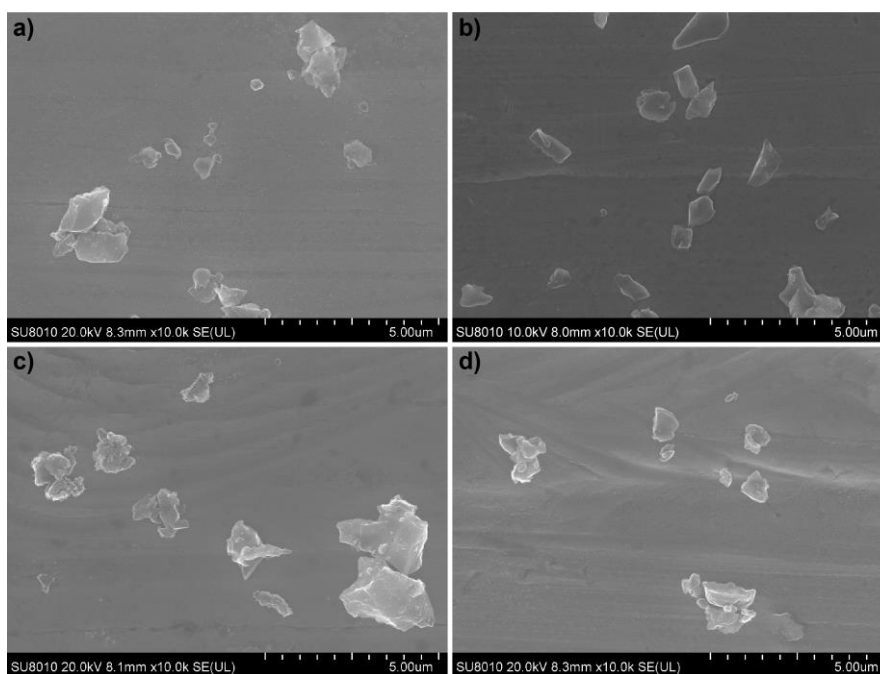

**Fig. S7** SEM images of a) C<sub>700</sub>; b) C<sub>800</sub>; c) C<sub>900</sub>; d) C<sub>1000</sub>.

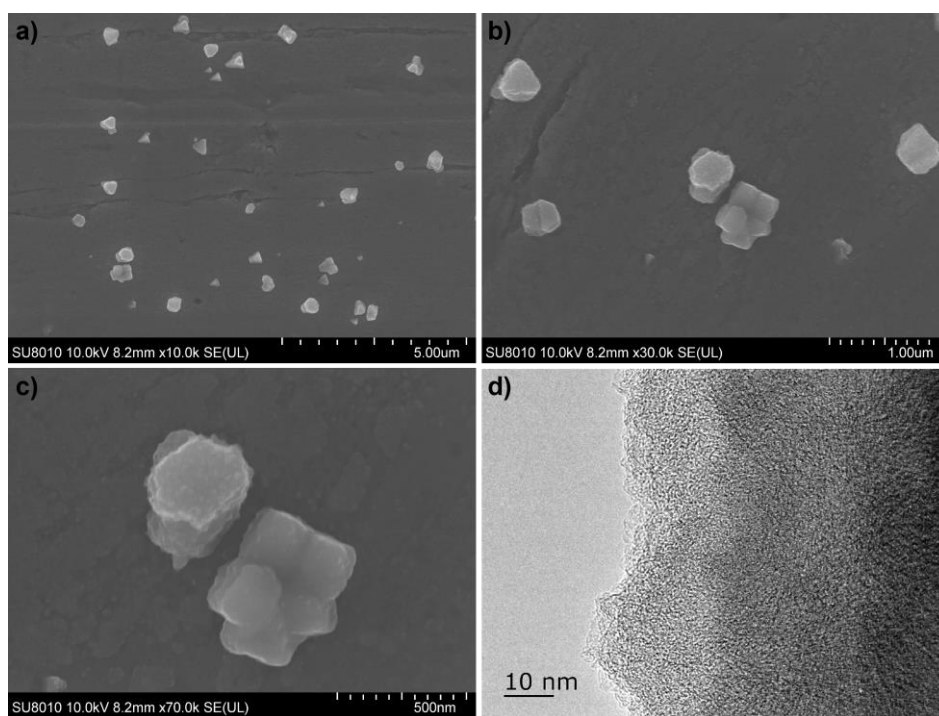

**Fig. S8** a), b), c) SEM images showing the regular polyhedral shape and hierarchical structure of C<sub>KI</sub>; d) TEM image of C<sub>KI</sub>.

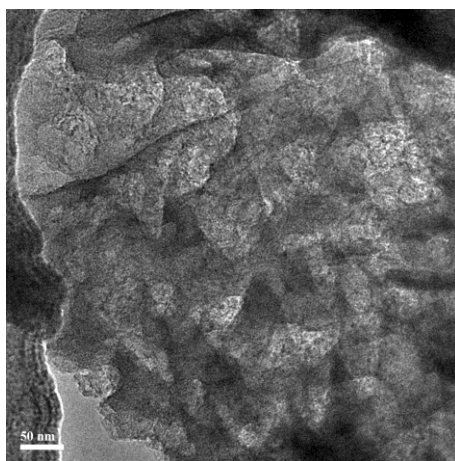

**Fig. S9** TEM image of C<sub>KI</sub>.

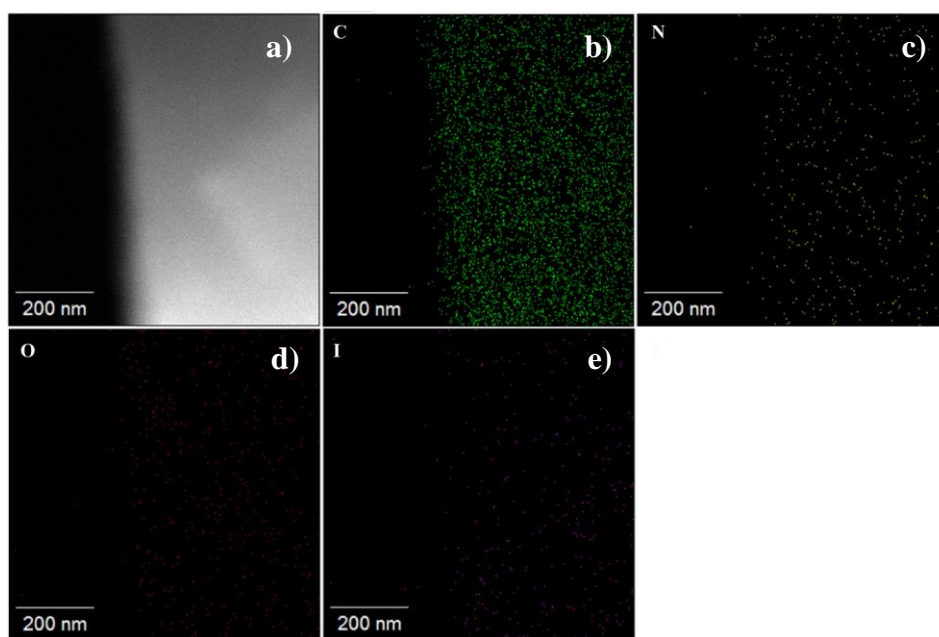

**Fig. S10** a) TEM image of  $C_{KI}$  and the corresponding elemental mapping of b) C, c) N, d) O and e) I.

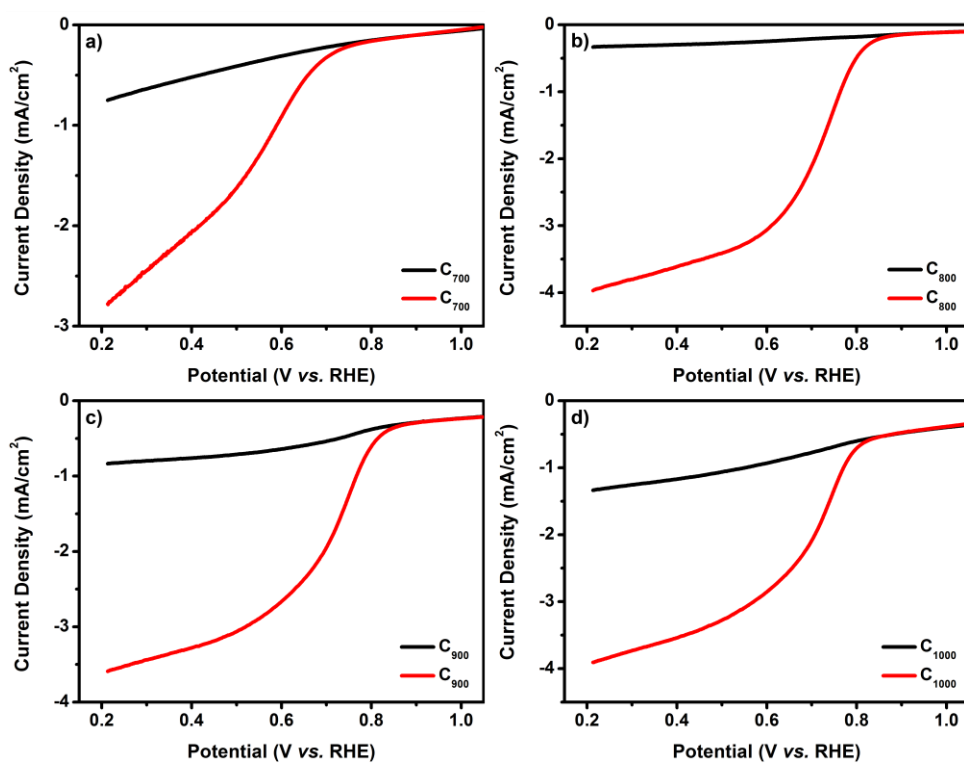

**Fig. S11** RDE curves of a)  $C_{700}$ , b)  $C_{800}$ , c)  $C_{900}$  and d)  $C_{1000}$  in 0.1 M KOH solution saturated with  $N_2$  (black) and  $O_2$  (red).



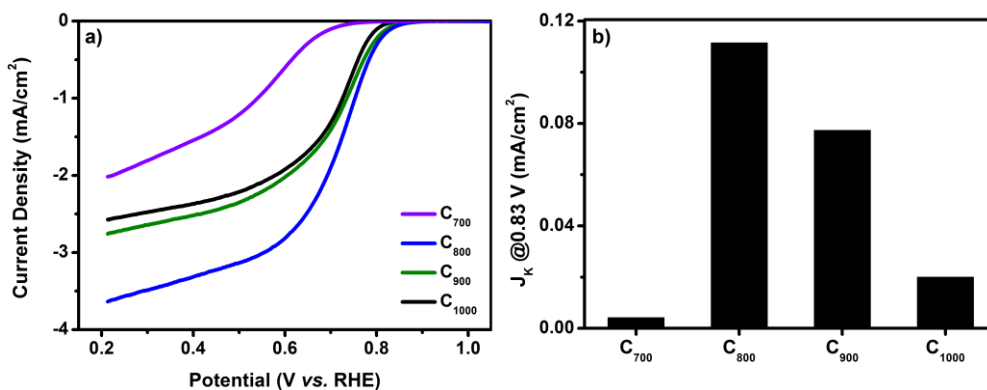

**Fig. S12** a) LSV polarization curves of  $C_T$  at scanning speed of  $10 \text{ mV s}^{-1}$  and rotating speed of  $1600 \text{ rpm}$  in  $0.1 \text{ M KOH}$  solution with background subtraction. b) Comparison of kinetic current density of  $C_T$  at  $0.83 \text{ V}$ .

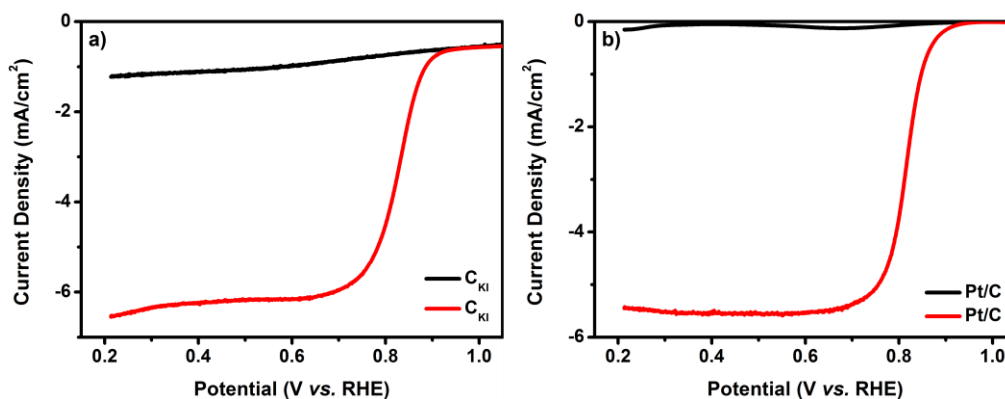

**Fig. S13** RDE curves of a)  $C_{KI}$  and b)  $Pt/C$  in  $0.1 \text{ M KOH}$  solution saturated with  $N_2$  (black) and  $O_2$  (red).

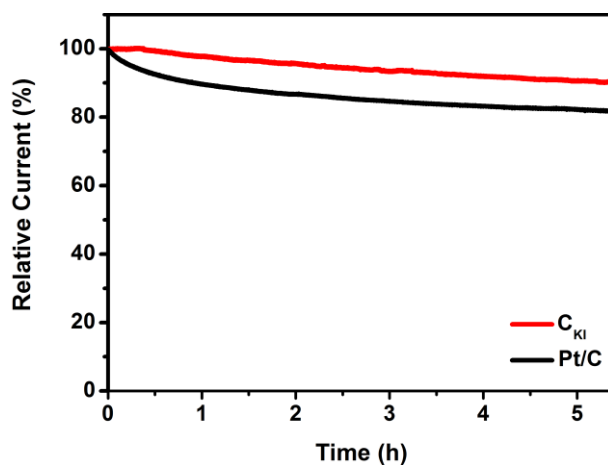

**Fig. S14.** Chronoamperometric responses of  $C_{KI}$  and  $20 \text{ wt\% Pt/C}$  in  $O_2$ -saturated  $0.1 \text{ M KOH}$  at  $0.764 \text{ V}$  with  $400 \text{ rpm}$  rotating speed.

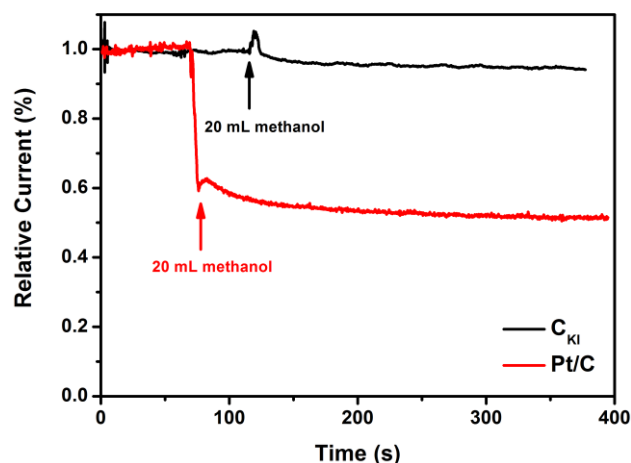

**Fig. S15** Chronoamperometric responses of C<sub>KI</sub> and 20 wt% Pt/C in O<sub>2</sub>-saturated 0.1 M KOH under methanol addition at 0.764 V with 400 rpm rotating speed.

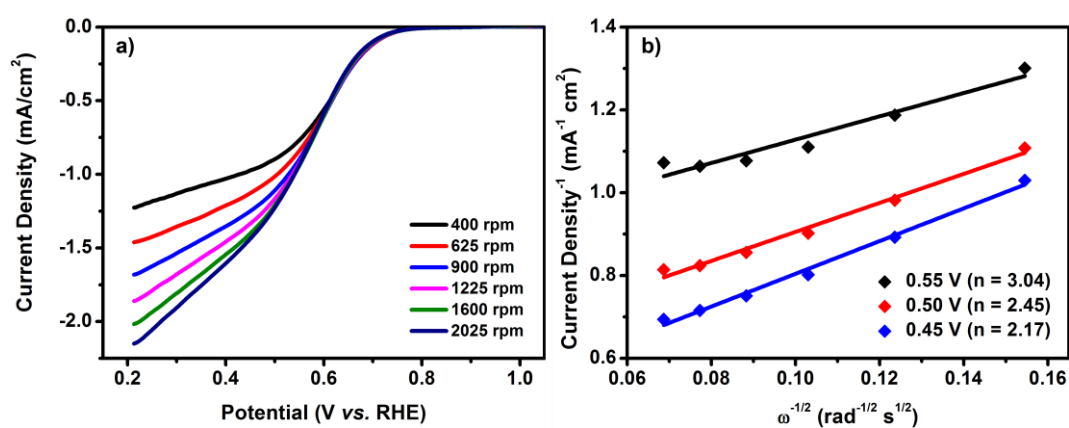

**Fig. S16** a) LSV polarization curves of C<sub>700</sub> in 0.1 M KOH at various rotating speeds. b) K–L plots of C<sub>700</sub> at various potentials.

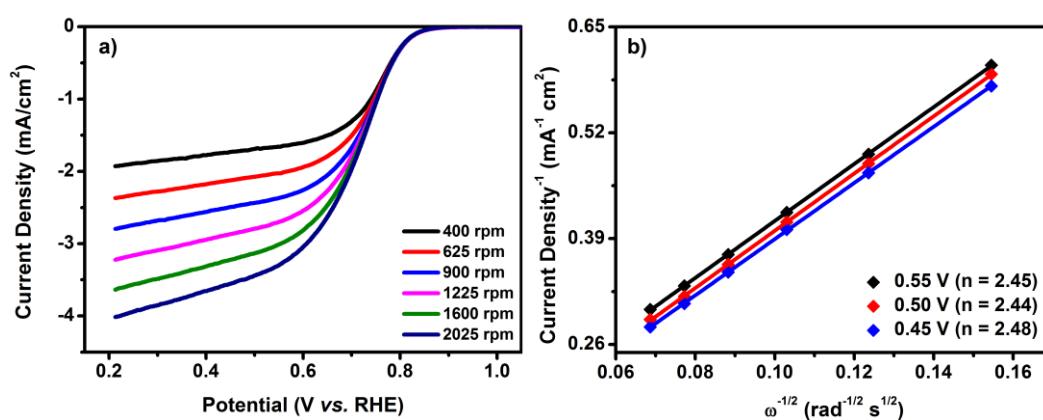

**Fig. S17** a) LSV polarization curves of C<sub>800</sub> in 0.1 M KOH at various rotating speeds. b) K–L plots of C<sub>800</sub> at various potentials.

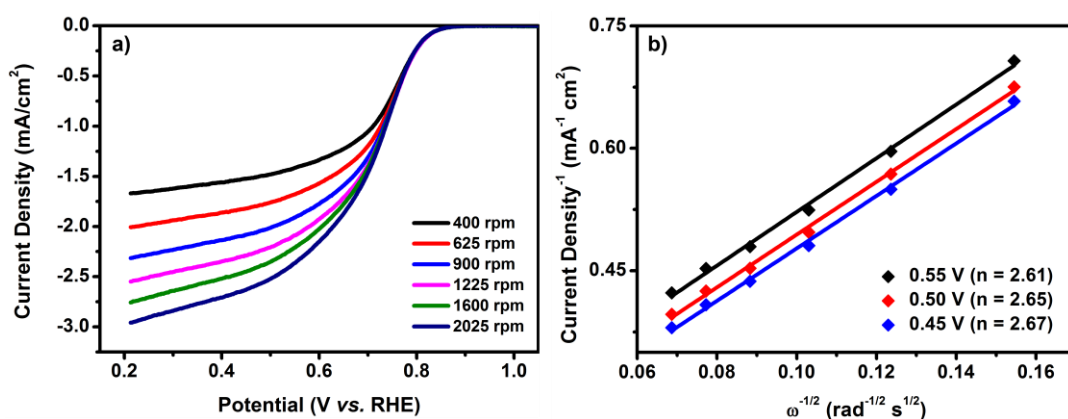

**Fig. S18** a) LSV polarization curves of C<sub>900</sub> in 0.1 M KOH at various rotating speeds. b) K–L plots of C<sub>900</sub> at various potentials.

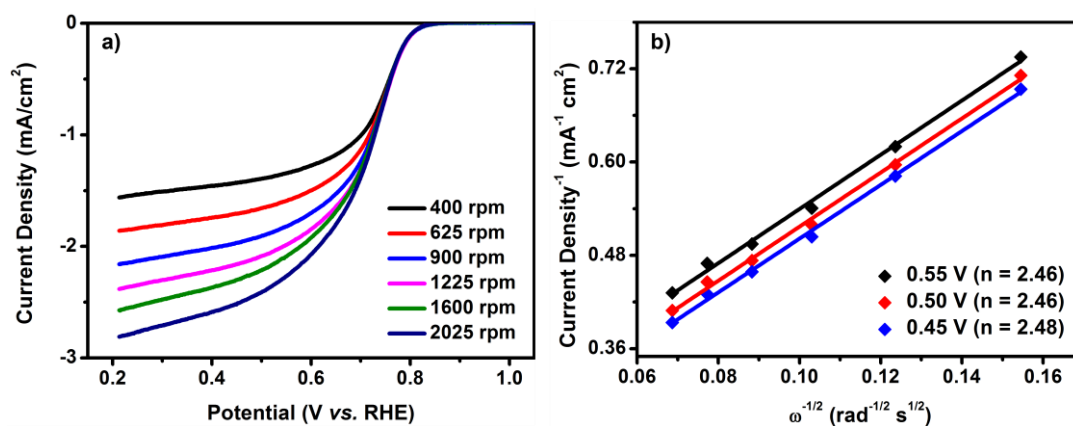

**Fig. S19** a) LSV polarization curves of C<sub>1000</sub> in 0.1 M KOH at various rotating speeds. b) K–L plots of C<sub>1000</sub> at various potentials.
